# Supplementary material for: Aerosol composition, sources and processes during wintertime in Beijing, China
Source: Copernicus journal article supplement (doi:10.5194/acp-13-4577-2013), 2013-05-02
Supplement: Supplementary file [file acp-13-4577-2013-supplement.pdf]

## Supplementary Information

### Aerosol Composition, Sources and Processes during Wintertime in Beijing, China

Y. L. Sun<sup>1</sup>, Z. F. Wang<sup>1</sup>, P. Q. Fu<sup>1</sup>, T. Yang<sup>1</sup>, Q. Jiang<sup>1,2</sup>, H. B. Dong<sup>1</sup>, J. Li<sup>1</sup>, J. J. Jia<sup>1</sup>

*<sup>1</sup>State Key Laboratory of Atmospheric Boundary Layer Physics and Atmospheric  
Chemistry, Institute of Atmospheric Physics, Chinese Academy of Sciences, Beijing  
100029, China*

*<sup>2</sup>Nanjing University of Information Science & Technology, Nanjing 210044, China*

Correspondence to Y. L. Sun ([sunyele@mail.iap.ac.cn](mailto:sunyele@mail.iap.ac.cn))

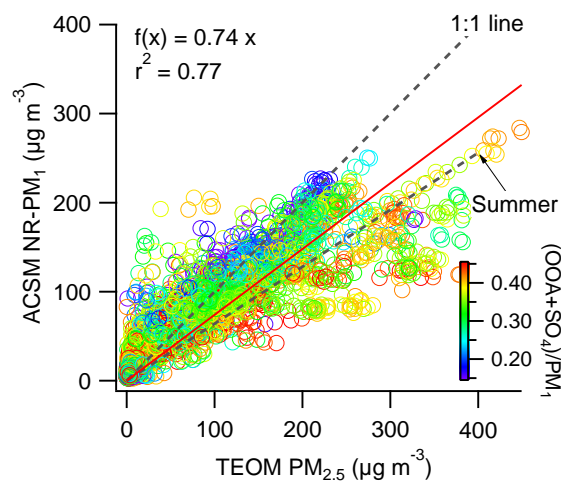

Figure S1. Correlation between NR-PM<sub>1</sub> (= Org+SO<sub>4</sub>+NO<sub>3</sub>+NH<sub>4</sub>+Cl) measured by the ACSM and PM<sub>2.5</sub> by the TEOM. The plot is color coded with the mass fraction of OOA + SO<sub>4</sub> in NR-PM<sub>1</sub>. In addition, the regression slope of 0.64 in summer is also shown.

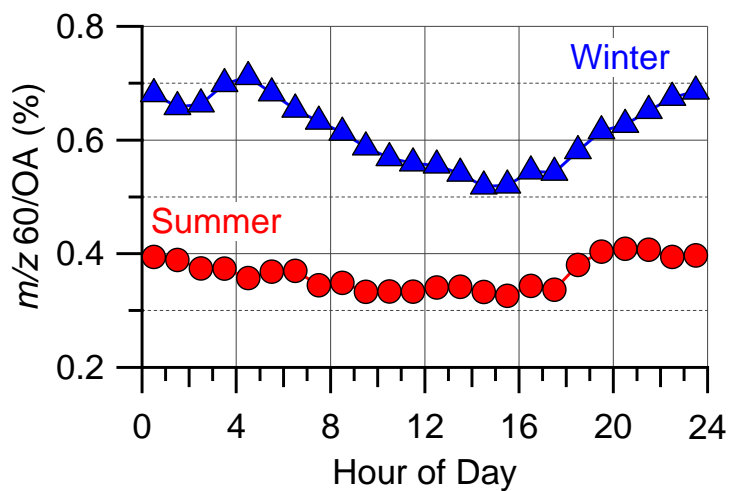

Figure S2. Diurnal profile of fraction of  $m/z$  60, i.e.,  $m/z$  60/OA, in summer and winter, respectively.

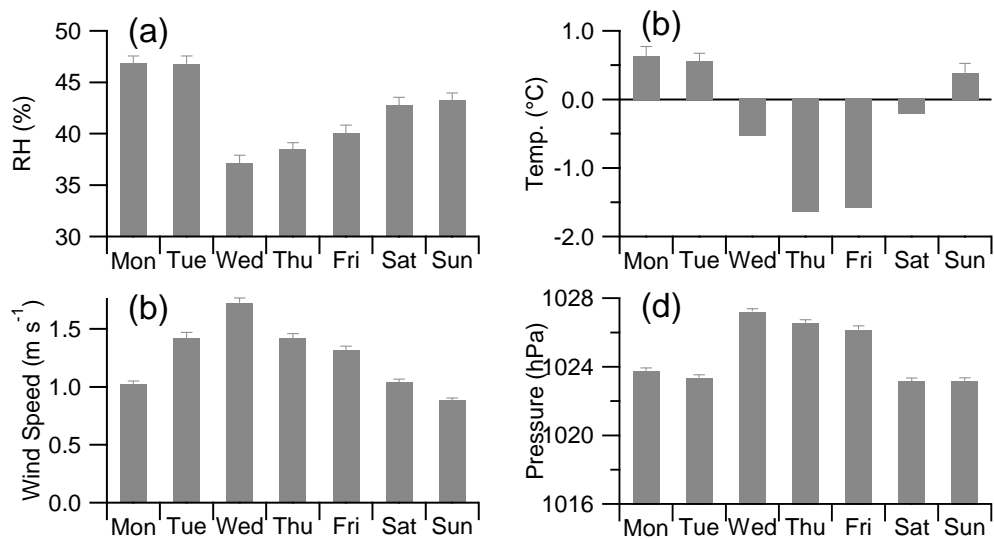

Figure S3. Day-of-week variations of meteorology including relative humidity (RH), temperature (Temp.), wind speed, and pressure for the entire study.

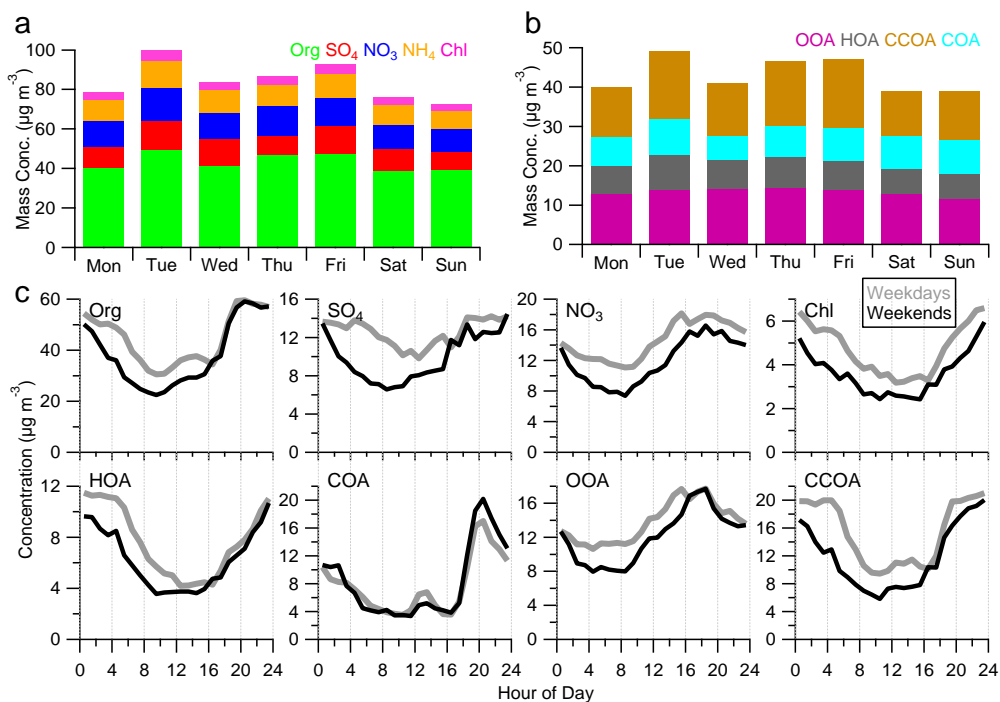

Figure S4. Day-of-week variations of (a) NR- $\text{PM}_{10}$  composition and (b) OA composition after excluding the clean periods marked in Fig. 1. (c) shows a comparison of the diurnal variations of NR- $\text{PM}_{10}$  species and OA components between weekdays and weekends
